# Supplementary material
Source: publisher site journal article supplement (https://www.dovepress.com/article/335070)
Supplement: Supplementary file 1 [file get_supplementary_file.php]

**Appendix A: English Version of the Hypertension Belief Assessment Tool**

Please select how much you agree or disagree with each statement regarding your beliefs towards hypertension

| **S.No** | | **Items** | **Responses** | | | | |
| --- | --- | --- | --- | --- | --- | --- | --- |
| Strongly disagree (1) | Disagree  (2) | Neutral (3) | Agree (4) | Strongly agree (5) |
| **Perceived susceptibility to hypertension** | | |  |  |  |  |  |
| 01 | My chance of developing hypertension is high | | 1 | 2 | 3 | 4 | 5 |
| 02 | The possibility that I will develop hypertension in a few years is very high. | | 1 | 2 | 3 | 4 | 5 |
| 03 | I can have hypertension even without the feeling of its symptoms | | 1 | 2 | 3 | 4 | 5 |
| 04 | I am more likely to catch HTN than other people | | 1 | 2 | 3 | 4 | 5 |
| **Perceived severity of hypertension** | | | | | | | |
| 05 | Hypertension is a serious disease | | 1 | 2 | 3 | 4 | 5 |
| 06 | Hypertension is a lifelong disease | | 1 | 2 | 3 | 4 | 5 |
| 07 | Complication of hypertension can cause permanent damage | | 1 | 2 | 3 | 4 | 5 |
| 08 | Hypertension can cause death | | 1 | 2 | 3 | 4 | 5 |
| 09 | Sudden falling may happen due to hypertension | | 1 | 2 | 3 | 4 | 5 |
| 10 | Hypertension will cause dependence on others | | 1 | 2 | 3 | 4 | 5 |
| 11 | Hypertension can threaten patients’ relationship with their family. | | 1 | 2 | 3 | 4 | 5 |
| 12 | Hypertension can cause sexual dysfunction | | 1 | 2 | 3 | 4 | 5 |
| 13 | Hypertension can cause financial burden | | 1 | 2 | 3 | 4 | 5 |
| **Perceived benefits of taking action** | | | | |  |  |  |
| 14 | Early detection of HTN makes prevention of complications easier. | | 1 | 2 | 3 | 4 | 5 |
| 15 | Timely initiation of treatment makes prevention of complications easier. | | 1 | 2 | 3 | 4 | 5 |
| 16 | Keeping blood pressure close to normal prevents hypertension complications | | 1 | 2 | 3 | 4 | 5 |
| **Perceived barriers to taking action** | | | | |  |  |  |
| 17 | Lack of health information can prevent getting healthcare services | | 1 | 2 | 3 | 4 | 5 |
| 18 | Lack of transportation makes it difficult for me to get healthcare service | | 1 | 2 | 3 | 4 | 5 |
| 19 | The cost of screening service makes it difficult for me to get the service | | 1 | 2 | 3 | 4 | 5 |
| 20 | Lack of nearby health facilities makes it difficult for me to get services | | 1 | 2 | 3 | 4 | 5 |
| **Self-efficacy** | | | | |  |  |  |
| 21 | I can know my status by checking my BP regularly | | 1 | 2 | 3 | 4 | 5 |
| 22 | I am sure of when to contact health workers while I am feeling unusual health conditions | | 1 | 2 | 3 | 4 | 5 |
| 23 | I follow health information about hypertension | | 1 | 2 | 3 | 4 | 5 |

**Appendix B. Amharic version of the Hypertension Belief Assessment Tool ( ስለ ደም ግፊት ህመም የሰዎች እምነት መለኪያ መተይቅ የአማርኛ ትርጉም)**

እባክዎ ስለ ደም ግፊት ህመም ያለወትን ግንዛቤ በተመለከተ ከሚከተለዉ አባባል ጋር ምን ያህል እንደሚስማሙ ወይም እንደማይስማሙ ይግለጹ

| **ተ.ቁ** | | **ጥያቄዎች** | **መልሶች** | | | | |
| --- | --- | --- | --- | --- | --- | --- | --- |
| በጣም አልስማማም(1) | አልስማማም (2) | ገለልተኛ (3) | እስማማለሁ (4) | በጣም እስማማለሁ (5) |
| **ስለ ደም ግፊት ህመም ተጋላጭነት የሰዎች ግንዛቤ** | | | | | | | |
| 01 | በደም ግፊት ህመም የመያዝ እድሌ ከፍተኛ ነዉ | | 1 | 2 | 3 | 4 | 5 |
| 02 | በጥቂት አመታት ዉስጥ በደም ግፊት ህመም የመያዝ እድሌ በጣም ከፍተኛ ነዉ | | 1 | 2 | 3 | 4 | 5 |
| 03 | የህመሙ ምልክቶች እንኳ ሣይሰሙኝ የደም ግፊት ህመም ሊኖርብኝ ይችላል | | 1 | 2 | 3 | 4 | 5 |
| 04 | ከሌሎች ሰዎች ይልቅ በደም ግፊት የመያዝ እድል አለኝ | | 1 | 2 | 3 | 4 | 5 |
| **ስለ ደም ግፊት አስከፊነት የሰዎች ግንዛቤ** | | | | | | | |
| 05 | የደም ግፊት ከባድ ህመም ነዉ | | 1 | 2 | 3 | 4 | 5 |
| 06 | የደም ግፊት የእድሜ ልክ ህመም ነዉ | | 1 | 2 | 3 | 4 | 5 |
| 07 | የደም ግፊት ህመም የሚያስከትለዉ ዉስብስብ ሁኔታ ለዘላቂ ጉዳት ያጋልጣል | | 1 | 2 | 3 | 4 | 5 |
| 08 | የደም ግፊት ህመም ሊገድል ይችላል | | 1 | 2 | 3 | 4 | 5 |
| 09 | በደም ግፊት ህመም ምክንያት ድንገተኛ መዉደቅ ሊከሰት ይችላል | | 1 | 2 | 3 | 4 | 5 |
| 10 | የደም ግፊት ህመም ታማሚዉ የሌሎች ጥገኛ እንዲሆን ያደርጋል | | 1 | 2 | 3 | 4 | 5 |
| 11 | የደም ግፊት ህመም የህመምተኞችንና የቤተሰብ ግኑኝነት ሊያዛባ ይችላል | | 1 | 2 | 3 | 4 | 5 |
| 12 | የደም ግፊት ህመም ስንፈተ-ወሲብን ሊያስከትል ይችላል | | 1 | 2 | 3 | 4 | 5 |
| 13 | የደም ግፊት ሀመም የገንዘብ ችግር ሊያስከትል የችላል | | 1 | 2 | 3 | 4 | 5 |
| **እርምጃ መዉሰድ ያሰገኛል ተብለዉ የሚታሰቡ ጥቅሞች** | | | | |  |  |  |
| 14 | የደም ግፊት ህመም መኖሩን በቅድሚያ መለየት ህመሙ የሚያስከትላቸዉን ዉስብስብ ችግሮች የመከላከሉን ሥራ ቀላል ያደርገዋል | | 1 | 2 | 3 | 4 | 5 |
| 15 | ህክምናን በተገቢዉ ሠዓት መጀመር የህመሙን ዉስብስብነት የመከላከሉን ስራ ቀላል ያደርገዋል | | 1 | 2 | 3 | 4 | 5 |
| 16 | የደም ግፊት ወደ ትክክለኛዉ(ኖርማል) የቀረበ እንዲሆን ማድረግ የደም ግፊት ህመም መወሳሰብን ይከላከላል | | 1 | 2 | 3 | 4 | 5 |
| **የሚወሰዱ እርምጃዎችን እንደሚገቱ የሚታወቁ መስናክሎች** | | | | |  |  |  |
| 17 | ስለ ጤና አጠባበቅ መረጃ አለማግኘት የጤና አገልግሎት እንዳይገኝ ያደርጋል | | 1 | 2 | 3 | 4 | 5 |
| 18 | የመጓጓዟ አለመኖር የጤና አገልግሎት የማገኝበትን ሁኔታ አስቸጋሪ ያደርግብኛል | | 1 | 2 | 3 | 4 | 5 |
| 19 | የጤና አገልግሎት ዋጋ መብዛት ህክምና የማገኝበትን ሁኔታ አስቸጋሪ ያደርግብኛል | | 1 | 2 | 3 | 4 | 5 |
| 20 | የጤና ተቋማት በቅርብ አለመገኘት አገልግሎት የማገኝበትን ሁኔታ አስቸጋሪ ያደርግብኛል | | 1 | 2 | 3 | 4 | 5 |
| **የግል ብቃት/በራስ የመተማመን ስሜት** | | | | |  |  |  |
| 21 | የደም ግፊቴን በየጊዜዉ በመለካት ሁኔታየን ማወቅ እችላለሁ | | 1 | 2 | 3 | 4 | 5 |
| 22 | ያልተለመደ የጤንነት ሁኔታ ሲያጋጥመኝ የህክምና ባለሙያወዎችን ምን ጊዜ ማግኘት እንደሚገባኝ በትክክል አዉቃለሁ | | 1 | 2 | 3 | 4 | 5 |
| 23 | ስለ ደም ግፊት ህመም የጤና መረጃ እከታተላለሁ | | 1 | 2 | 3 | 4 | 5 |
